# Supplementary material
Source: MDPI journal article supplement (https://www.mdpi.com/2073-4344/9/1/59)
Supplement: s1 [file s1]

# Structure and Photocatalytic Activity of PdCrO<sub>x</sub> Cocatalyst on SrTiO<sub>3</sub> for Overall Water Splitting

Tomoki Kanazawa <sup>1,2</sup>, Shunsuke Nozawa <sup>3</sup>, Daling Lu <sup>4</sup> and Kazuhiko Maeda <sup>1,\*</sup>

<sup>1</sup> Department of Chemistry, School of Science, Tokyo Institute of Technology, 2-12-1-NE-2 Ookayama, Meguro-ku, Tokyo 152-8550, Japan

<sup>2</sup> Japan Society for the Promotion of Science, Kojimachi Business Center Building, 5-3-1 Kojimachi, Chiyoda-ku, Tokyo 102-0083

<sup>3</sup> Institute of Materials Structure Science, High Energy Accelerator Research Organization, 1-1 Oho, Tsukuba, Ibaraki 305-0801, Japan

<sup>4</sup> Suzukakedai Materials Analysis Division, Technical Department, Tokyo Institute of Technology 4259 Nagatsuta-cho, Midori-ku, Yokohama 226-8503, Japan

\*Correspondence: maedak@chem.titech.ac.jp; Tel.: +81- 3-5734-2239

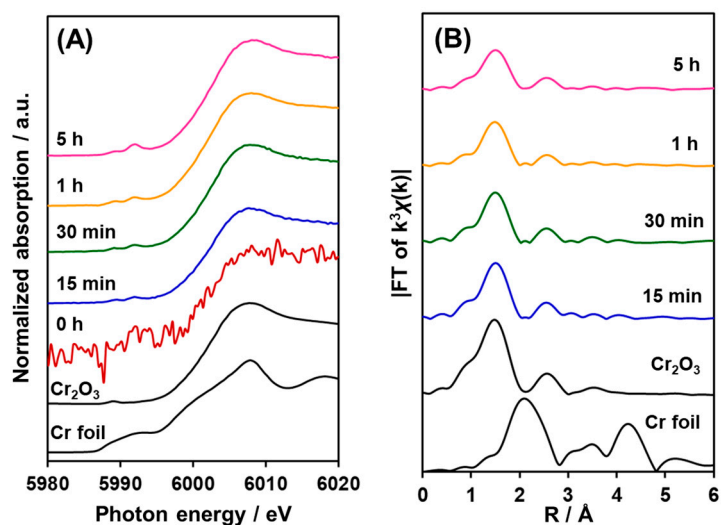

**Figure S1.** (A) XANES spectra and (B) Fourier transforms of  $k^3$ -weighted Cr K-edge of PdCrO<sub>x</sub> nanoparticles (0–5 h) on SrTiO<sub>3</sub>. Cr foil and Cr<sub>2</sub>O<sub>3</sub> are shown as references.

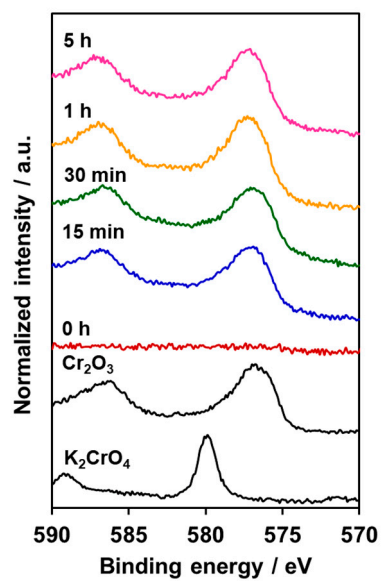

**Figure S2.** Cr 2p XPS spectra of PdCrO<sub>x</sub>/SrTiO<sub>3</sub> prepared for various time periods (0–5h). Data for K<sub>2</sub>CrO<sub>4</sub> and Cr<sub>2</sub>O<sub>3</sub> are shown as references.

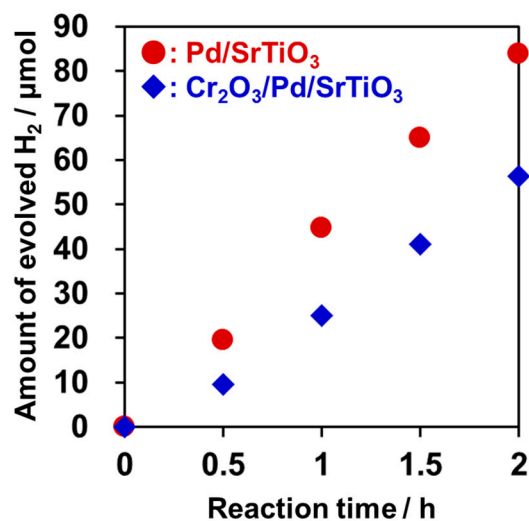

**Figure S3.** Time course of H<sub>2</sub> evolution over Pd or Cr<sub>2</sub>O<sub>3</sub>/Pd nanoparticle loaded SrTiO<sub>3</sub>. Reaction conditions: catalyst, 100 mg; 10 vol% aqueous methanol solution, 140 mL; metal precursors, Pd 0.5 wt%, Cr 1.0 wt%; light source, a 300 W xenon lamp ( $\lambda > 300$  nm).
